# Supplementary material
Source: Springer Nature journal article supplement (https://www.springermedizin.de/resource/supplementary/12865_2006_118_MOESM3_ESM.pdf/9428608)

**A**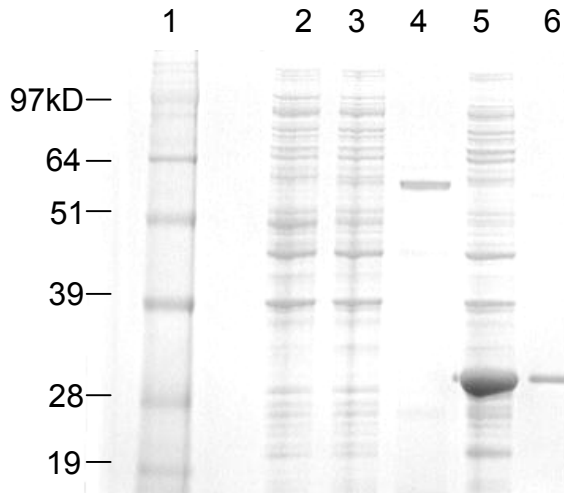**B**

(a) 1 2 3 4 5 6      (b) 1 2 3 4 5 6

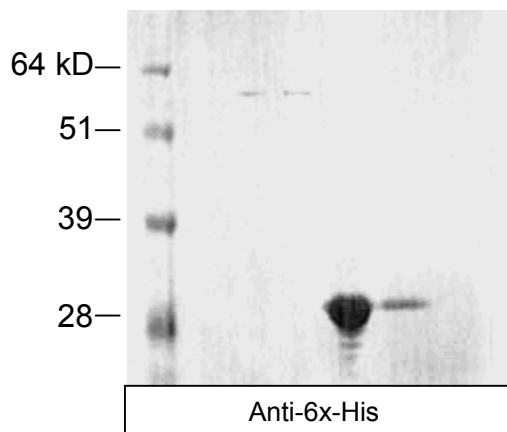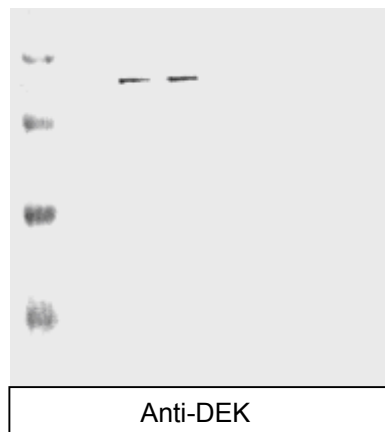

Supplement: MOESM3 [file 9428608]
